# Supplementary material for: Risk Assessment for Linear Regression Models in Metrology
Source: Preprints.org preprint supplement (doi:10.20944/preprints202402.0948.v1), 2024-02-19
Supplement: Supplementary file 2 [file supplementary]

Archive with 1 entries (1 files):
- Supplementary materials.pdf
